# Supplementary material for: A resonance light scattering quenching system for studying DNA sequence recognition of actinomycin D
Source: Royal Society of Chemistry journal article supplement (doi:10.1039/c1an15855d), 2011-12-13
Supplement: c1an15855d.pdf [file c1an15855d.pdf]

## Supplementary Information

### **A resonance light scattering quenching system for studying DNA sequence recognition of actinomycin D**

**Zhanguang Chen <sup>a,\*</sup>, Guomin Zhang <sup>a</sup>, Xi Chen <sup>b</sup>, Junhui Chen <sup>c</sup>, Sihua Qian <sup>a</sup> and Qiang Li <sup>a</sup>**

<sup>a</sup> *Department of Chemistry, Shantou University, Shantou 515063, China*

<sup>b</sup> *Guangdong Pharmaceutical University, Guangzhou 510006, China*

<sup>c</sup> *Department of Radiology, Peking University Shenzhen Hospital, Shenzhen 518036, China*

---

*Corresponding author. Tel.: +86 75482903330; fax: +86 75482902767. E-mail address:*

*kqlu@stu.edu.cn (Z. Chen).*

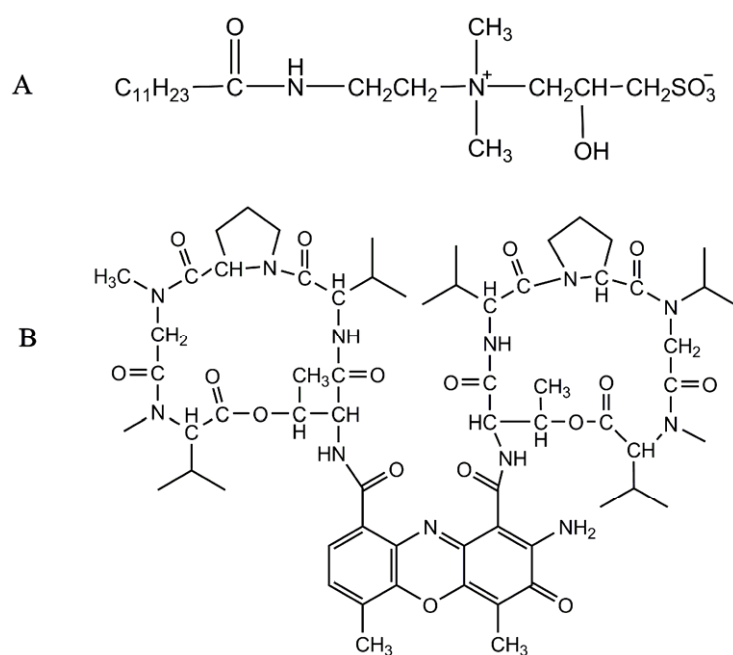

**Scheme S1** Structure of HSB and ACTD.

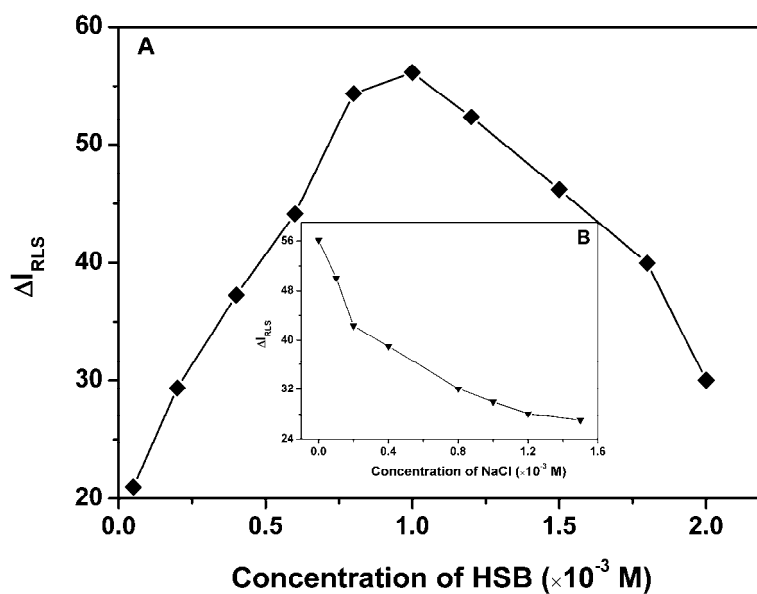

**Fig. S1** (A) Influence of HSB concentration to the analytical system. Conditions: pH=7.4; dsDNA,  $2.0 \mu\text{g mL}^{-1}$ ; ACTD,  $2.0 \mu\text{g mL}^{-1}$ . (B) Influence of ionic strength to the analytical system.

Conditions: pH=7.4; dsDNA,  $2.0 \mu\text{g mL}^{-1}$ ; ACTD,  $2.0 \mu\text{g mL}^{-1}$ .
